# Supplementary material for: LINC00022 acts as an oncogene in colorectal cancer progression via sponging miR-375-3p to regulate FOXF1 expression
Source: PubMed Central journal article supplement (PMC9040237; doi:10.1186/s12885-022-09566-5), 2022-04-26

HCT116

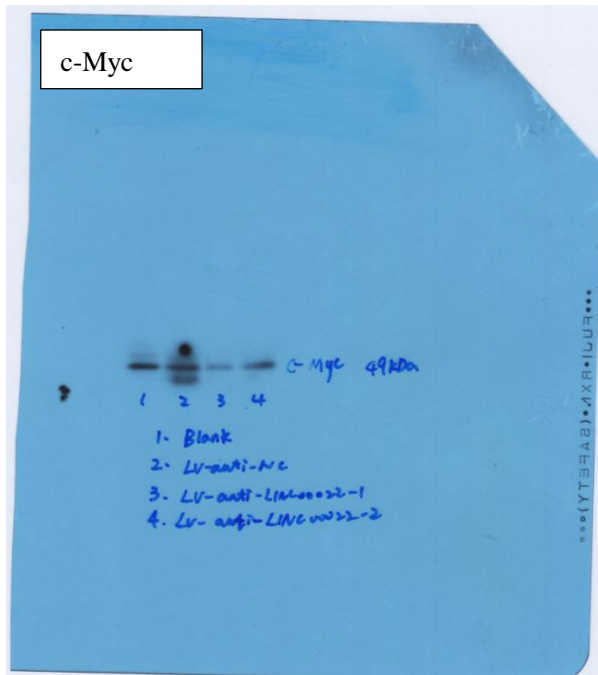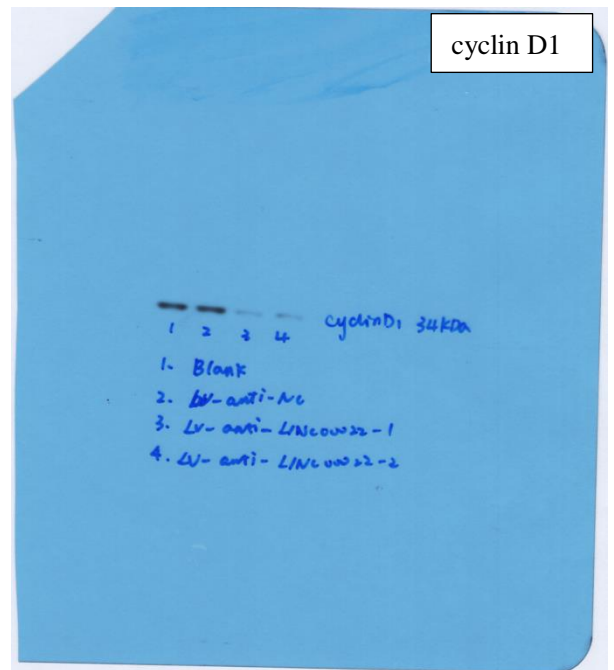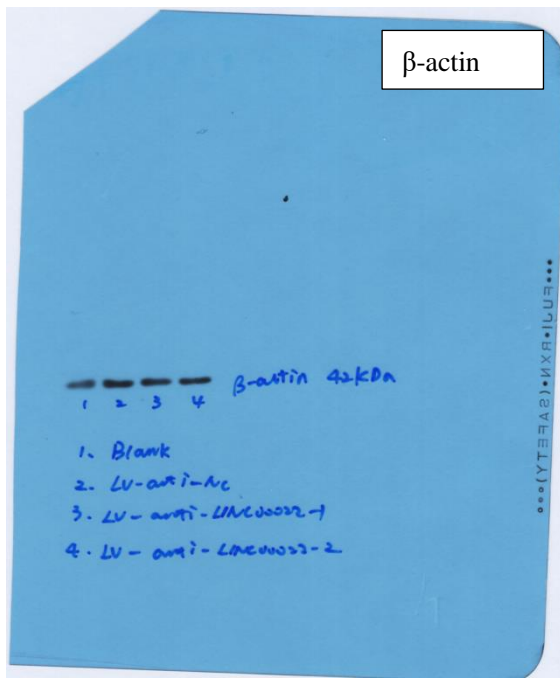

## DLD1

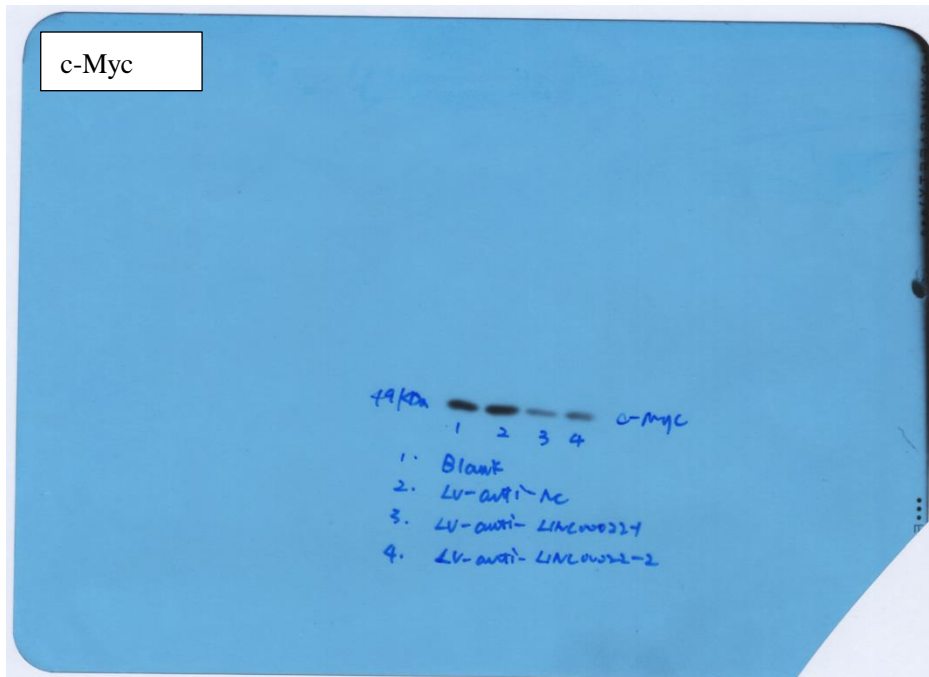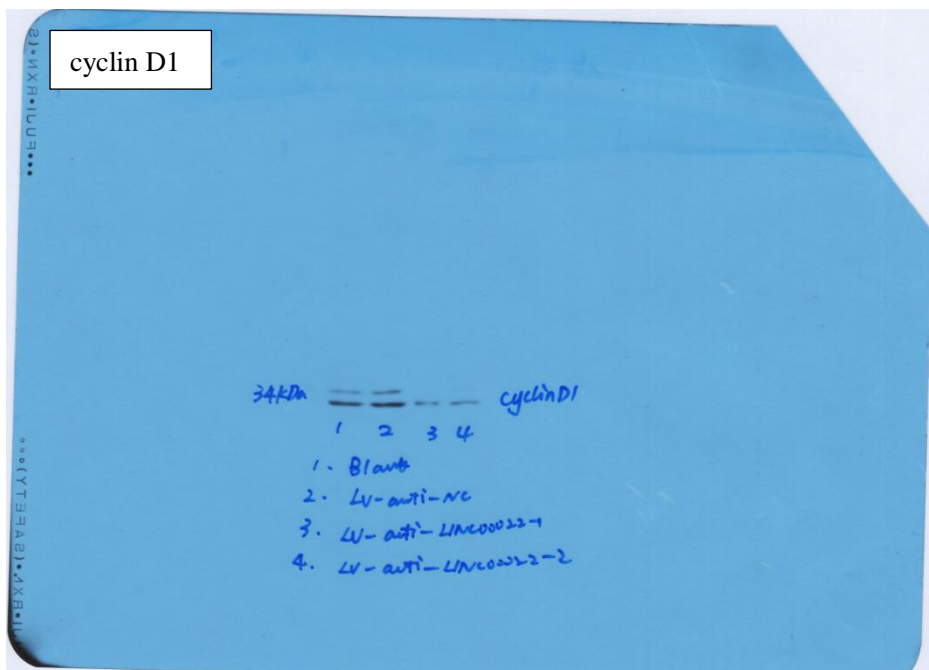

$\beta$ -actin

$\alpha$   $\beta$ -actin

|       |            |                   |                   |
|-------|------------|-------------------|-------------------|
| 1     | 2          | 3                 | 4                 |
| Blank | LV-anti-Mc | LV-anti-LIN0022-1 | LV-anti-LIN0022-2 |

••FUJIFILM(SAFETY)••

## CaCo-2

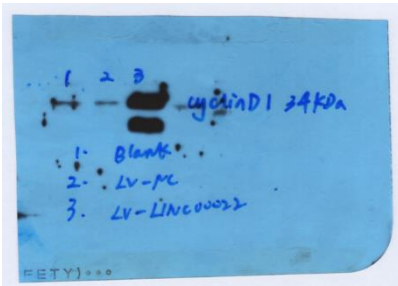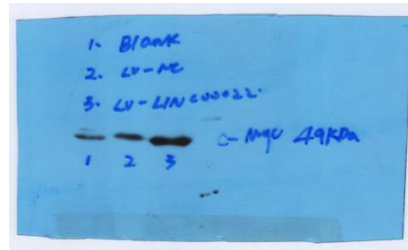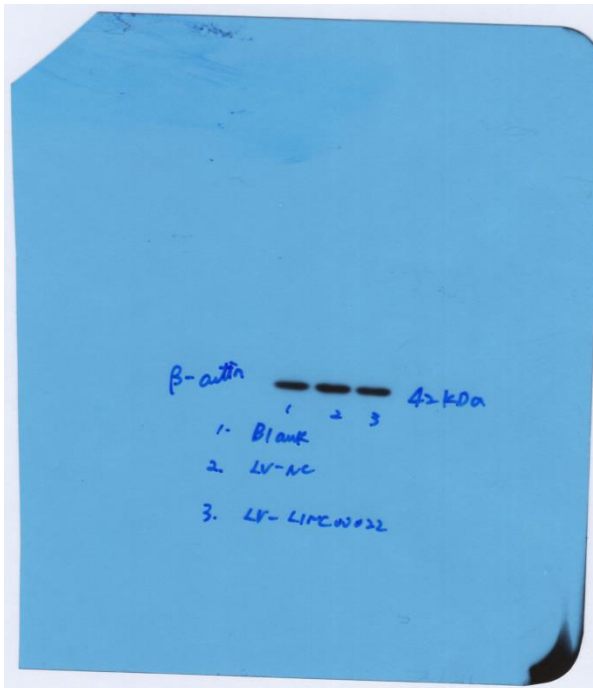

Supplement: 12885_2022_9566_MOESM2_ESM.pdf [file 12885_2022_9566_MOESM2_ESM.pdf]
