# Supplementary material for: LINC00022 acts as an oncogene in colorectal cancer progression via sponging miR-375-3p to regulate FOXF1 expression
Source: PubMed Central journal article supplement (PMC9040237; doi:10.1186/s12885-022-09566-5), 2022-04-26
Supplement: 12885_2022_9566_MOESM3_ESM.pdf [file 12885_2022_9566_MOESM3_ESM.pdf]

Supplementary Fig. S3b  
The original blot images of Fig. 3b.

**HCT116**

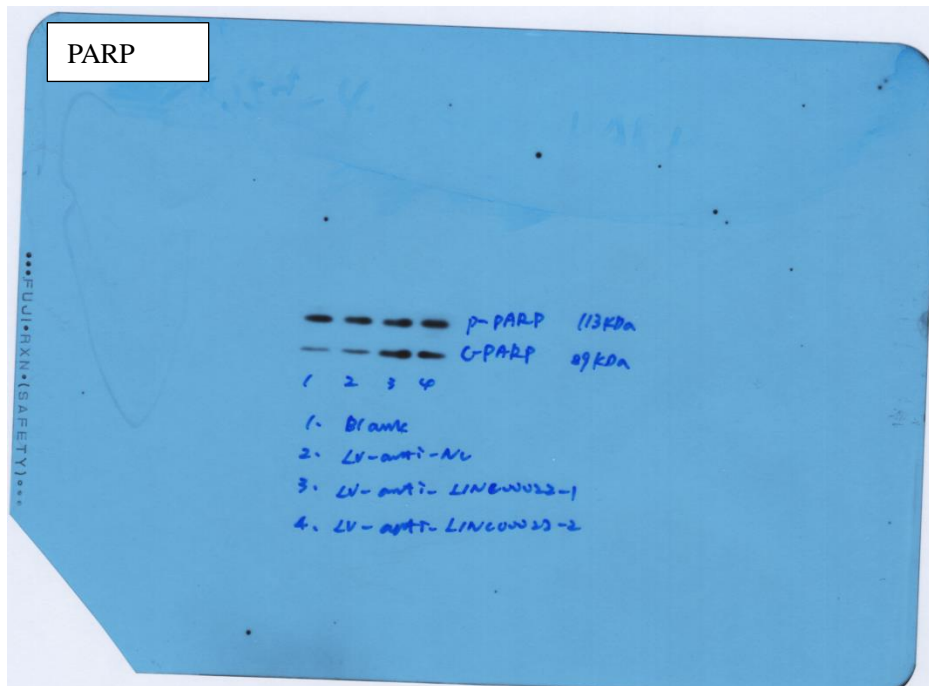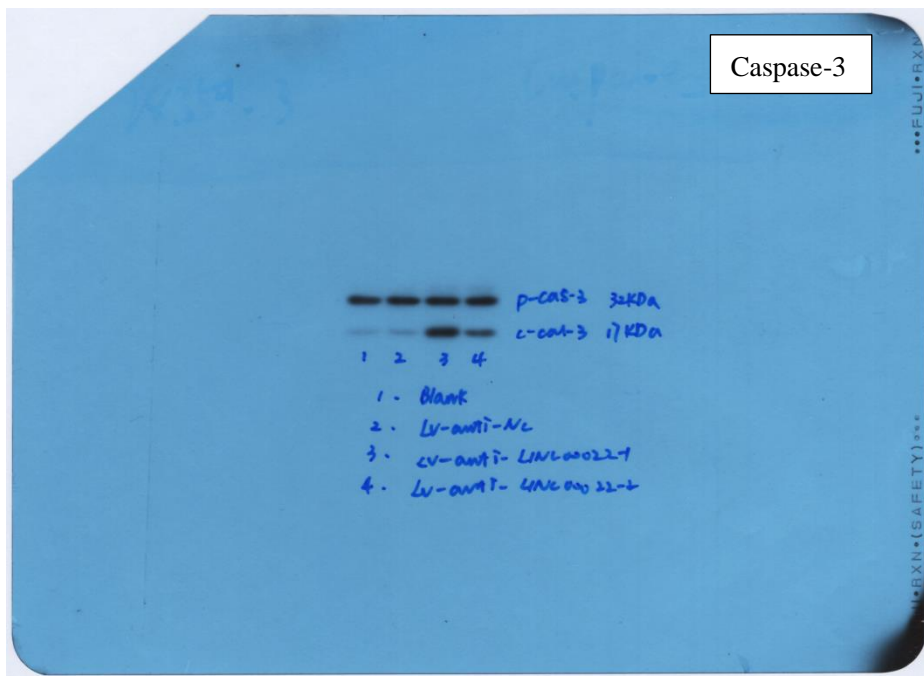

$\beta$ -actin

— — — —  $\beta$ -actin 4kb

1 2 3 4

1. Blank
2. LV-anti-Nv
3. LV-anti-LINCOSS2-1
4. LV-anti-LINCOSS2-2

## DLD1

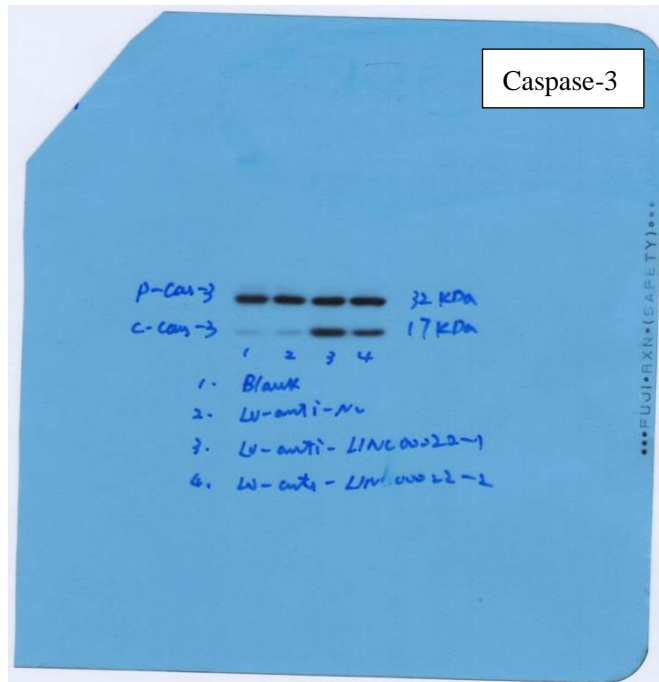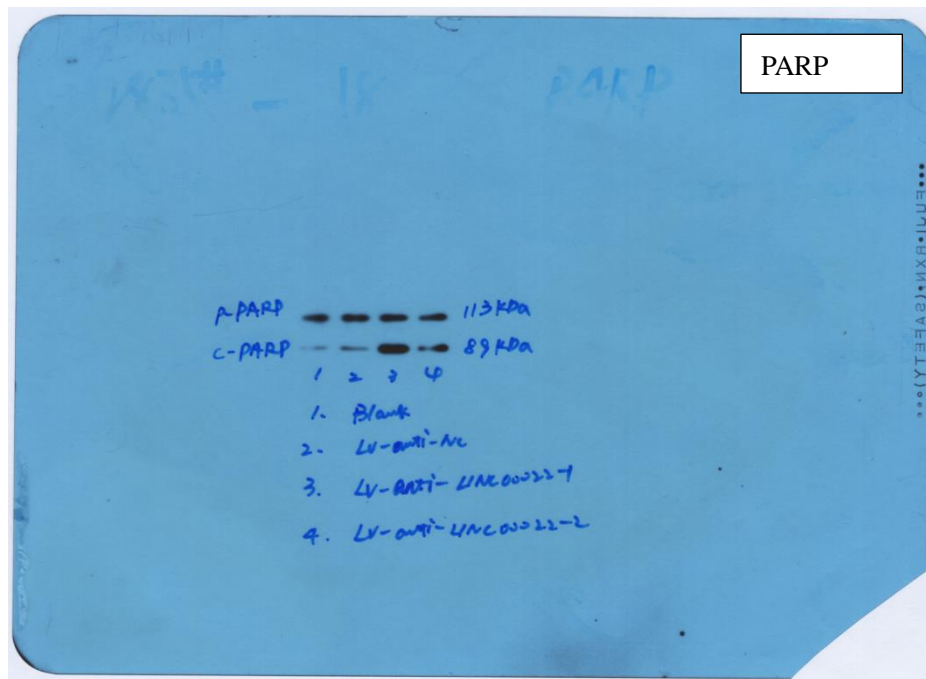

$\beta$ -actin

$\alpha$ -tub  
1 2 3 4  $\beta$ -actin

1. Blank
2. LV-anti- $\alpha$
3. LV-anti-LIM00022-1
4. LV-anti-LIM00022-2

FUJIFILM SAFETY
