# Supplementary material for: LINC00022 acts as an oncogene in colorectal cancer progression via sponging miR-375-3p to regulate FOXF1 expression
Source: PubMed Central journal article supplement (PMC9040237; doi:10.1186/s12885-022-09566-5), 2022-04-26
Supplement: 12885_2022_9566_MOESM4_ESM.pdf [file 12885_2022_9566_MOESM4_ESM.pdf]

**HCT116**

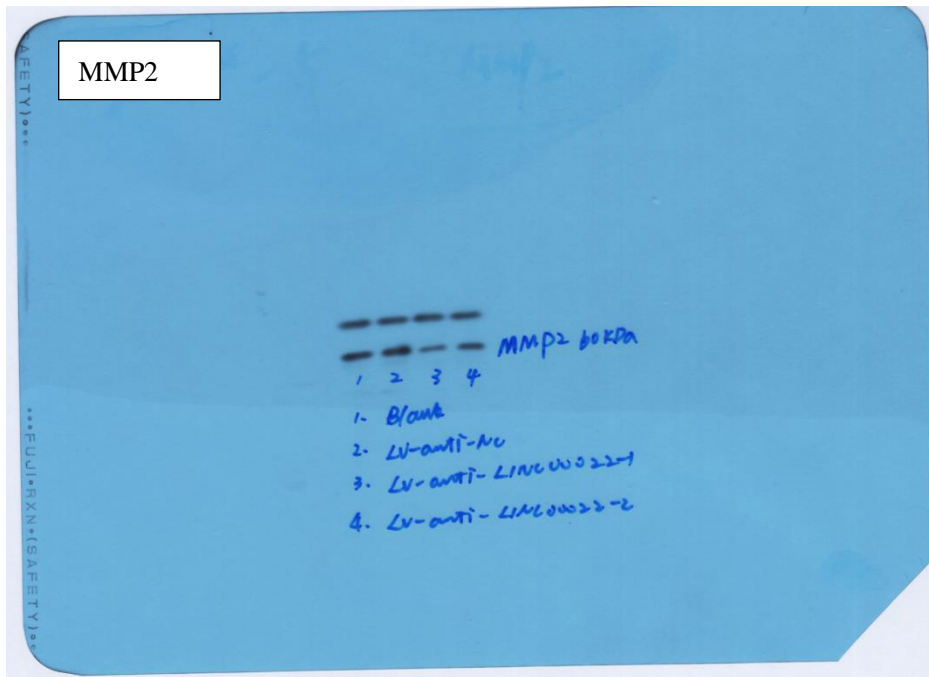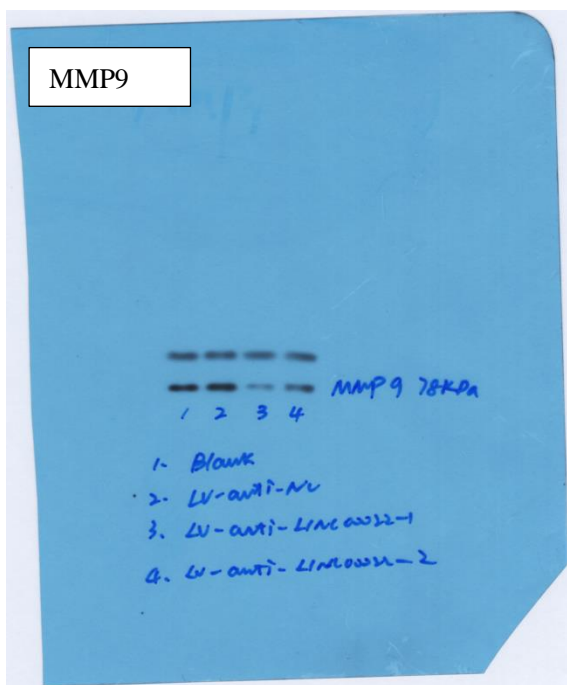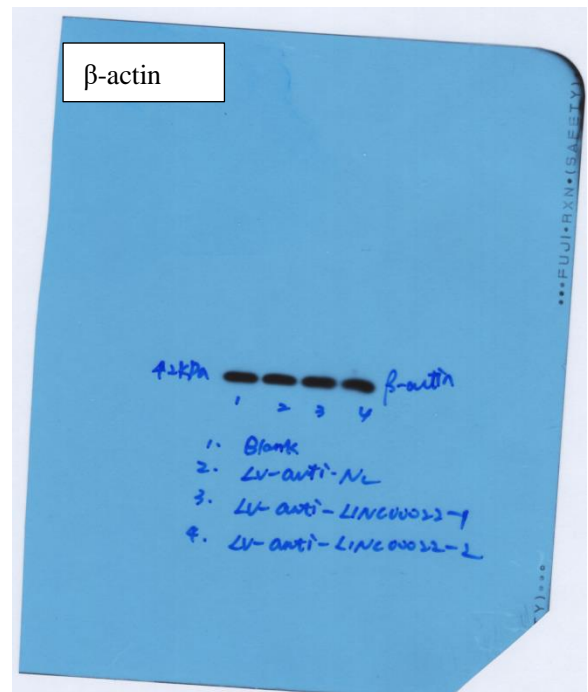

# DLD1

MMP2

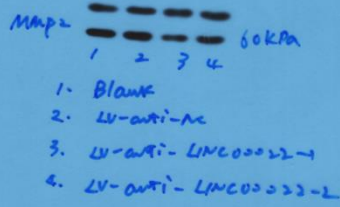

MMP9

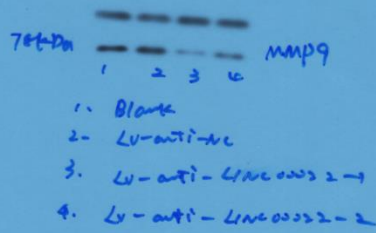

$\beta$ -actin

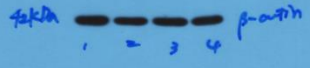

- 1. Blank
- 2. LV-ANTI-NC
- 3. LV-ANTI-LINC0022-1
- 4. LV-ANTI-LINC0022-2

...XYTEBACIXFFIJUE...

## Caco-2

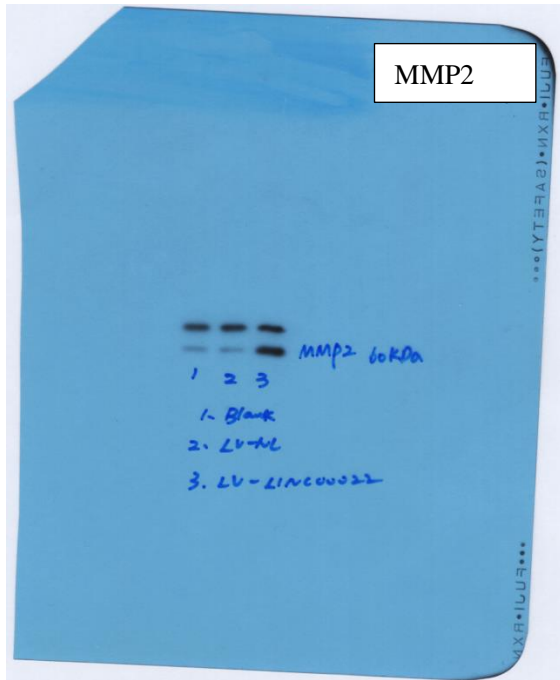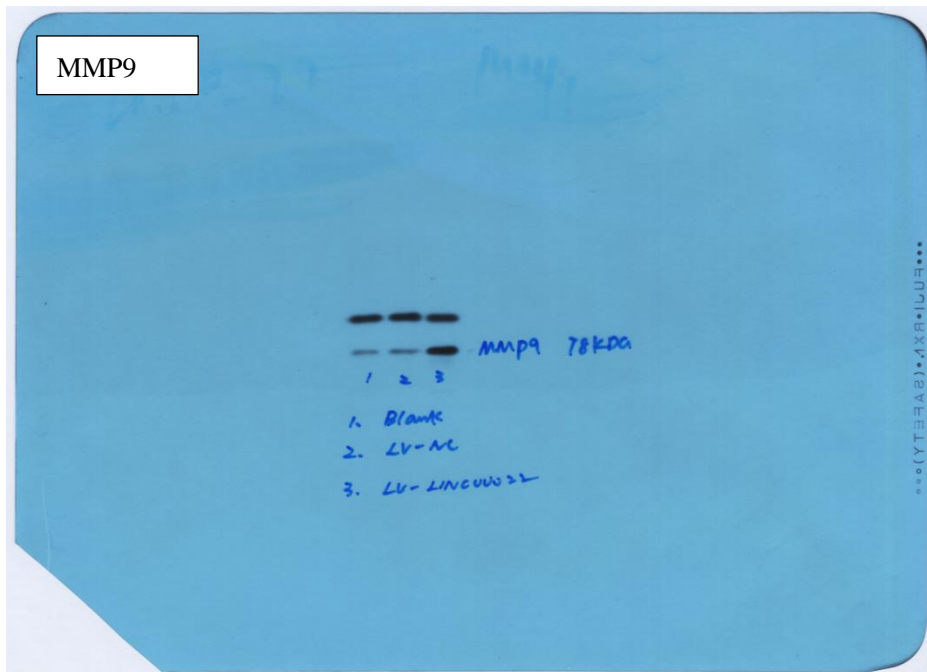

$\beta$ -actin

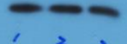  $\beta$ -actin 42kDa  
1 2 3  
1. Blank  
2. LV-NC  
3. LV-LINC0032
