# Supplementary material for: LINC00022 acts as an oncogene in colorectal cancer progression via sponging miR-375-3p to regulate FOXF1 expression
Source: PubMed Central journal article supplement (PMC9040237; doi:10.1186/s12885-022-09566-5), 2022-04-26
Supplement: 12885_2022_9566_MOESM6_ESM.pdf [file 12885_2022_9566_MOESM6_ESM.pdf]

Supplementary Fig. S6c  
The original blot images of Fig. 6c.

### HCT116

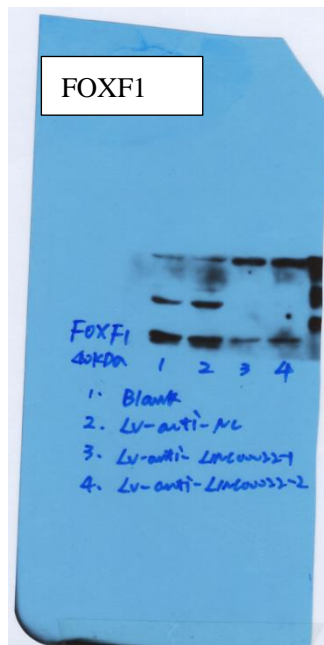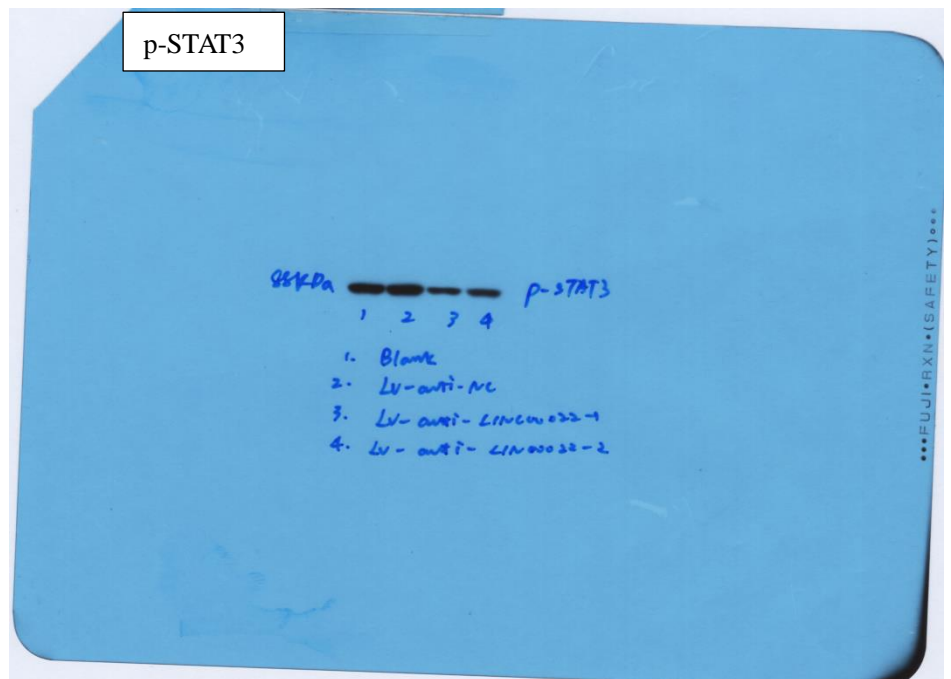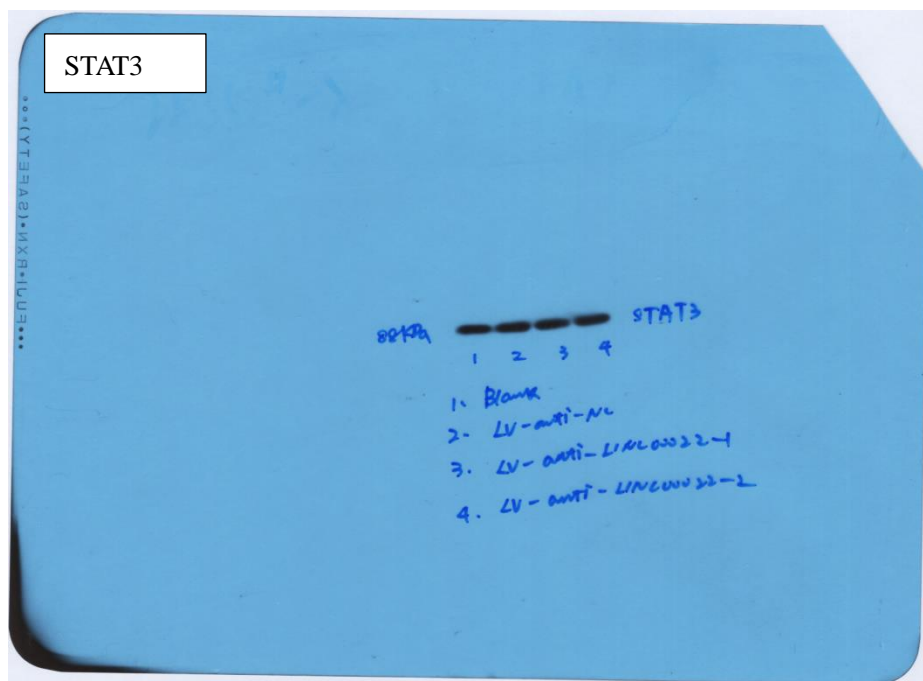

$\beta$ -actin

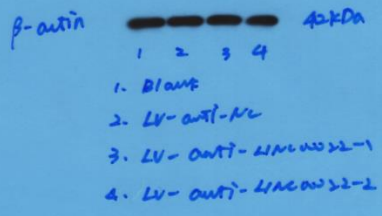

... (Y T B A B ) . U X P . U U U . . . .

DLD1

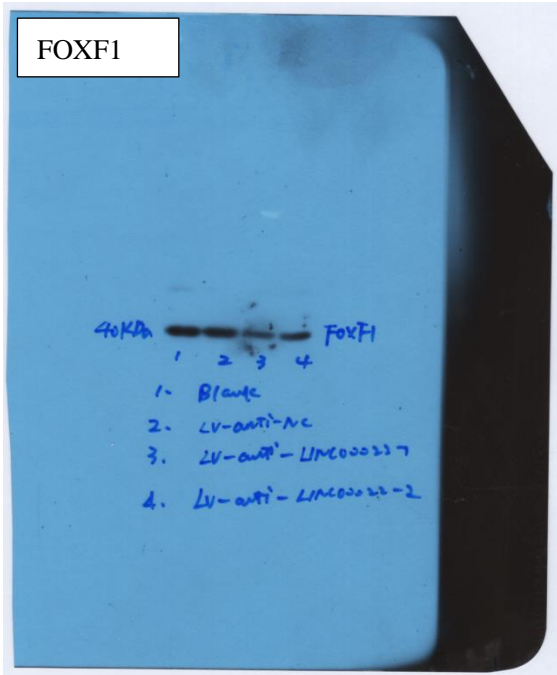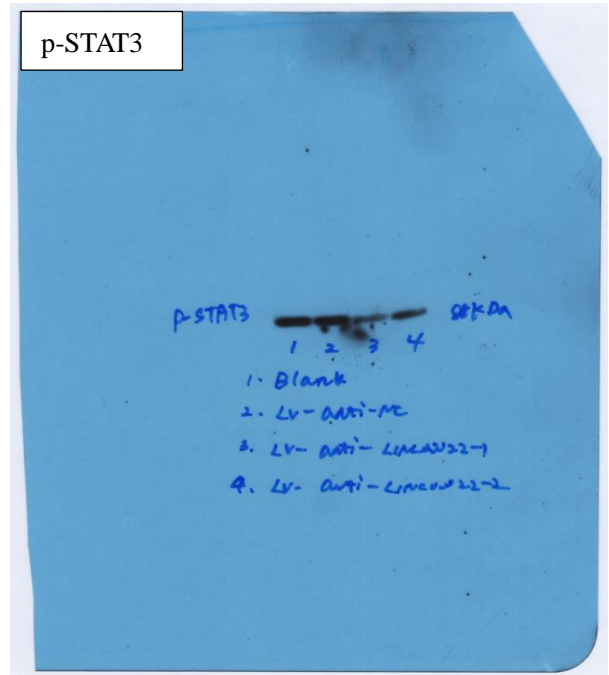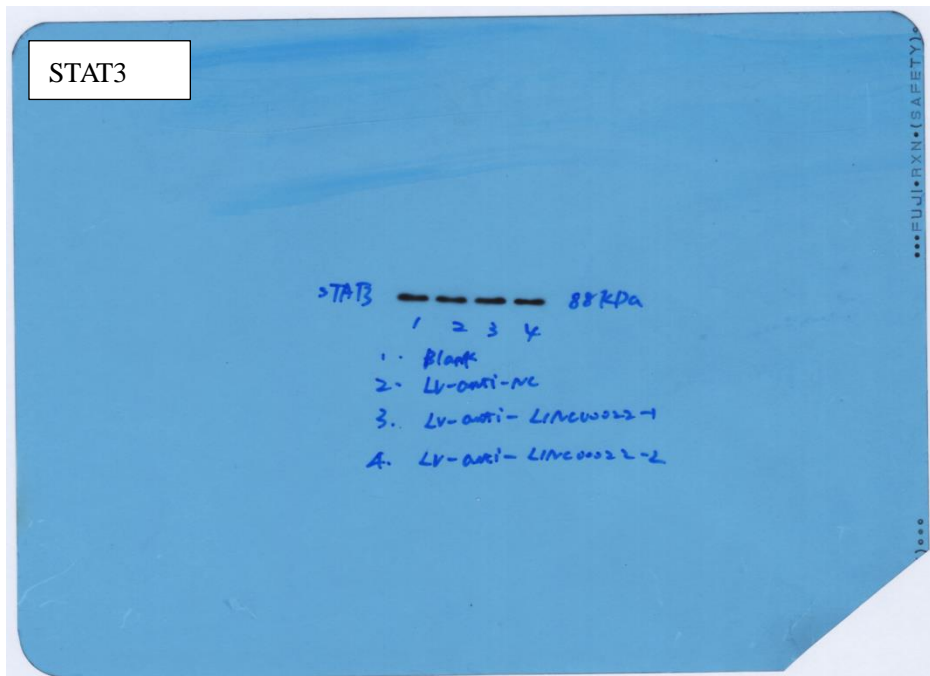

$\beta$ -actin

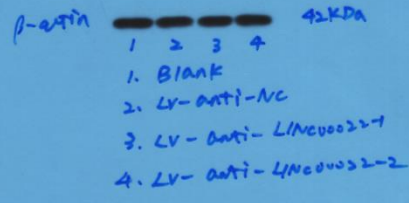

## CaCo-2

FOXF1

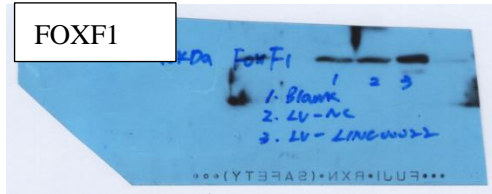

p-STAT3

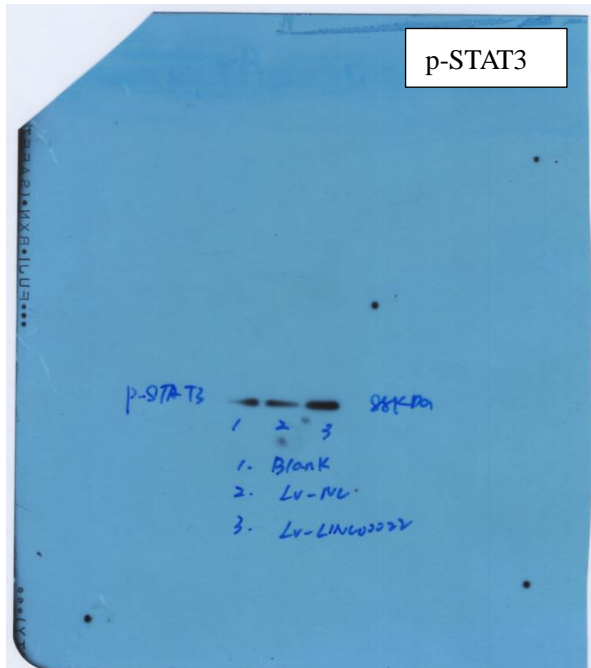

STAT3

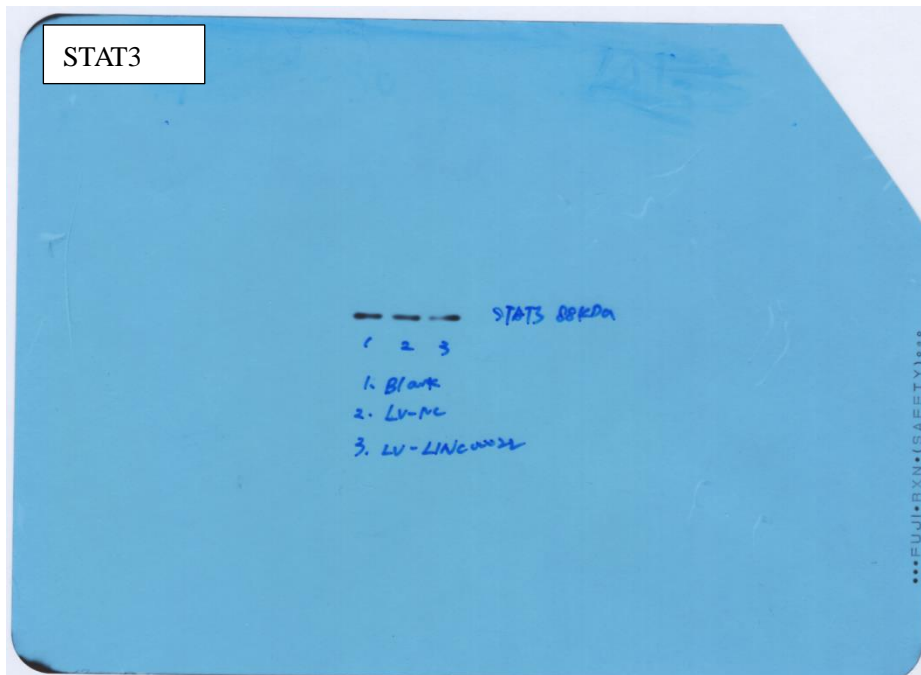

$\beta$ -actin

$\beta$ -actin       $\beta$ -actin  
1   2   3  
1. Blank  
2. D-ME  
3. LV-LINE 000 22

\*\*\*FUJIFILM(SAFETY)\*\*\*
