# Supplementary material for: LINC00022 acts as an oncogene in colorectal cancer progression via sponging miR-375-3p to regulate FOXF1 expression
Source: PubMed Central journal article supplement (PMC9040237; doi:10.1186/s12885-022-09566-5), 2022-04-26
Supplement: 12885_2022_9566_MOESM7_ESM.pdf [file 12885_2022_9566_MOESM7_ESM.pdf]

Supplementary Fig. S7d  
The original blot images of Fig. 7d.

**HCT116**

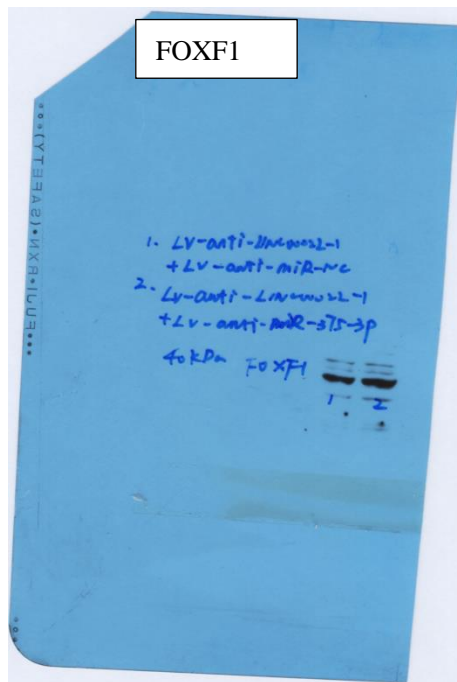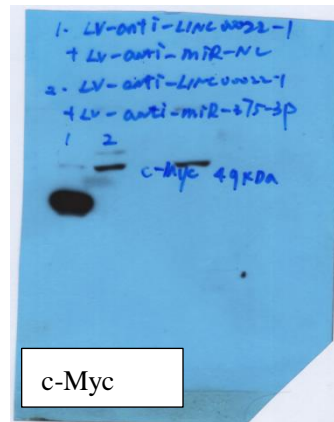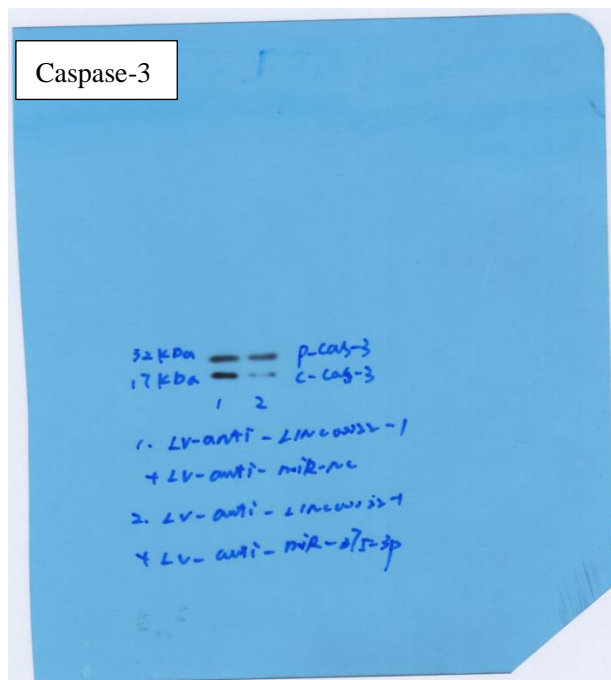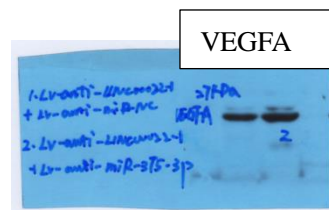

MMP2

== MMP2 60 kDa  
1 2

1. LV-anti-LINC0032-1  
+ LV-anti-miR-nc
2. LV-anti-LINC0032-1  
+ LV-anti-miR-375-3p

$\beta$ -actin

==  $\beta$ -actin 42 kDa  
1 2

1. LV-anti-LINC0032-1  
+ LV-anti-miR-nc
2. LV-anti-LINC0032-1  
+ LV-anti-miR-375-3p
