# Supplementary material for: LINC00022 acts as an oncogene in colorectal cancer progression via sponging miR-375-3p to regulate FOXF1 expression
Source: PubMed Central journal article supplement (PMC9040237; doi:10.1186/s12885-022-09566-5), 2022-04-26

Supplementary Fig. S8e  
The original blot images of Fig. 8e.

**HCT116**

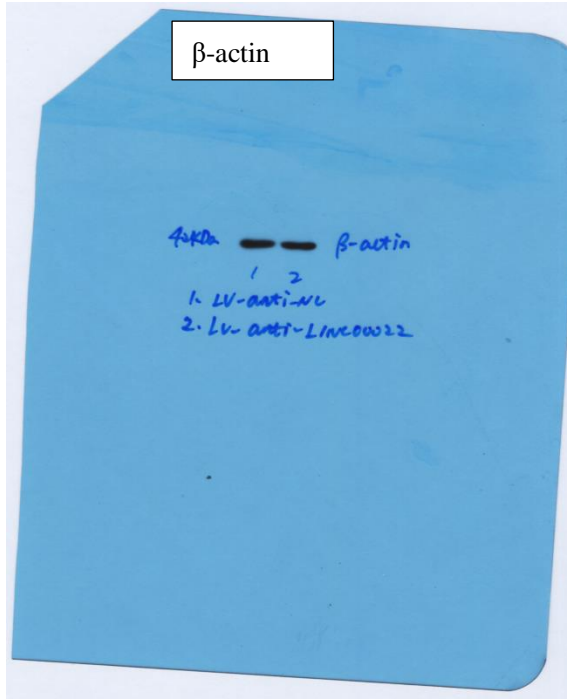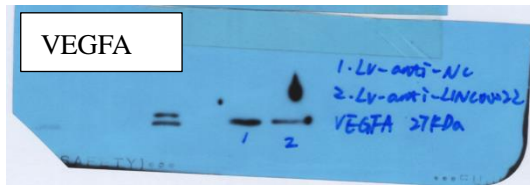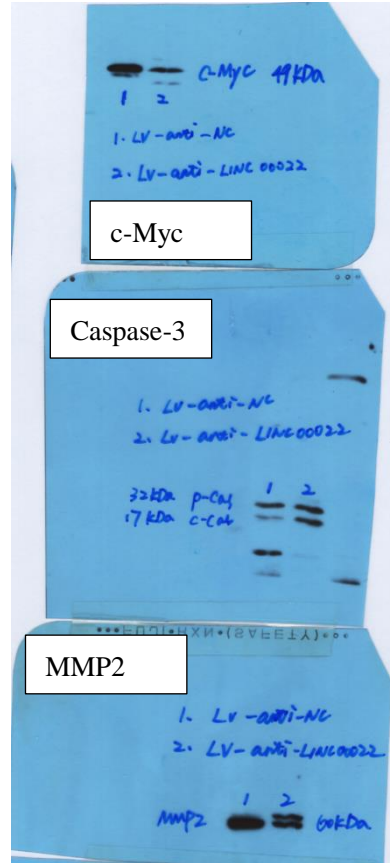

## CaCo-2

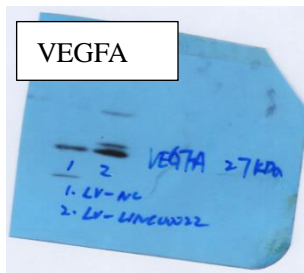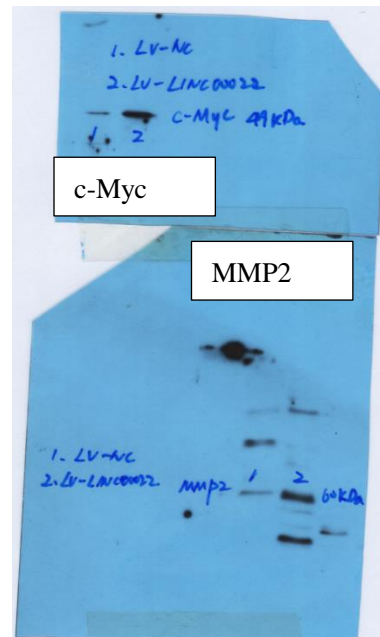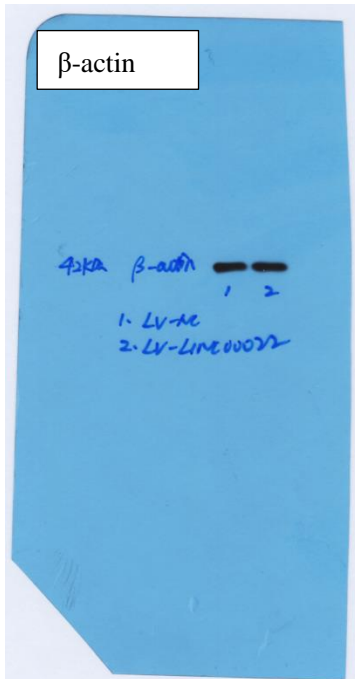

Supplement: 12885_2022_9566_MOESM8_ESM.pdf [file 12885_2022_9566_MOESM8_ESM.pdf]
